# Supplementary material
Source: MDPI journal article supplement (https://www.mdpi.com/2311-553X/10/3/29)
Supplement: s1 [file s1]

# Dysregulation of a Subset of Circulating and Vesicle-Associated miRNA in Pancreatic Cancer

Giulia Girolimetti <sup>1</sup>, Iulia Andreea Pelisenco <sup>2</sup>, Leonardo Henry Eusebi <sup>3,4</sup>, Claudio Ricci <sup>3,5</sup>, Beatrice Cavina <sup>3,6</sup>, Ivana Kurelac <sup>3,6</sup>, Tiziano Verri <sup>1</sup>, Matteo Calcagnile <sup>1</sup>, Pietro Alifano <sup>7</sup>, Alessandro Salvi <sup>2</sup>, Cecilia Bucci <sup>7,\*</sup> and Flora Guerra <sup>1</sup>

- <sup>1</sup> Department of Biological and Environmental Sciences and Technologies (DiSTeBA), University of Salento, Via Provinciale Lecce-Monteroni 165, 73100 Lecce, Italy; [giulia.girolimetti@unisalento.it](mailto:giulia.girolimetti@unisalento.it) (G.G.); [tiziano.verri@unisalento.it](mailto:tiziano.verri@unisalento.it) (T.V.); [matteo.calcagnile@unisalento.it](mailto:matteo.calcagnile@unisalento.it) (M.C.); [flora.guerra@unisalento.it](mailto:flora.guerra@unisalento.it) (F.G.)
  - <sup>2</sup> Department of Molecular and Translational Medicine, University of Brescia, Viale Europa 11, 25123 Brescia, Italy; [i.pelisenco@unibs.it](mailto:i.pelisenco@unibs.it) (I.A.P.); [alessandro.salvi@unibs.it](mailto:alessandro.salvi@unibs.it) (A.S.)
  - <sup>3</sup> Department of Medical and Surgical Sciences (DIMEC), University of Bologna, Via Massarenti 9, 40138 Bologna, Italy; [leonardo.eusebi@unibo.it](mailto:leonardo.eusebi@unibo.it) (L.H.E.); [claudio.ricci6@unibo.it](mailto:claudio.ricci6@unibo.it) (C.R.); [beatrice.cavina2@unibo.it](mailto:beatrice.cavina2@unibo.it) (B.C.); [ivana.kurelac@unibo.it](mailto:ivana.kurelac@unibo.it) (I.K.)
  - <sup>4</sup> Gastroenterology Unit, IRCCS Azienda Ospedaliero-Universitaria Di Bologna, Via Massarenti 9, 40138 Bologna, Italy;
  - <sup>5</sup> Pancreatic Surgery Unit, IRCCS Azienda Ospedaliero-Universitaria Di Bologna, Via Massarenti 9, 40138 Bologna, Italy;
  - <sup>6</sup> Centre for Applied Biomedical Research (CRBA), University of Bologna, Via Massarenti 9, 40138 Bologna, Italy
  - <sup>7</sup> Department of Experimental Medicine (DiMeS), University of Salento, Via Provinciale Lecce-Monteroni 165, 73100 Lecce, Italy; [pietro.alifano@unisalento.it](mailto:pietro.alifano@unisalento.it) (P.A.)
- \* Correspondence: [cecilia.bucci@unisalento.it](mailto:cecilia.bucci@unisalento.it) (C.B.); Tel.: +39-0832-298900

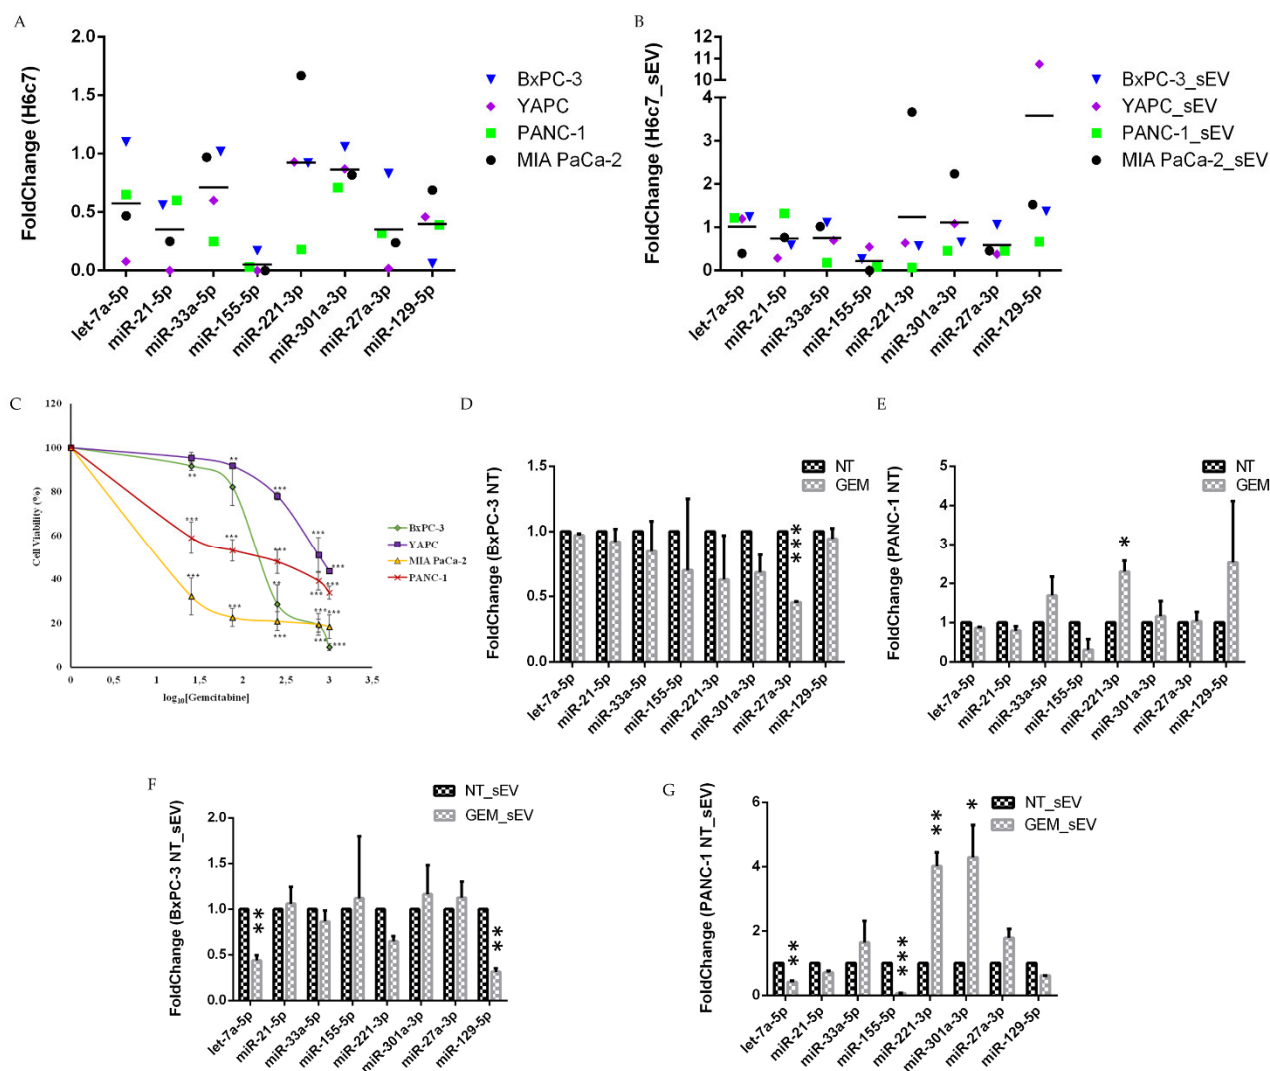

**Figure S1.** Intracellular and vesicle-associated miRNA relative expression evaluated by RT-qPCR. (A) Intracellular expression levels and (B) levels of selected vesicle-associated miRNAs in each PDAC cell line compared to the control H6c7 cells. Grand mean is shown; (C) Viability of the PDAC cancer cell lines during 72 h treatment with increasing gemcitabine concentrations. Data are presented as mean  $\pm$  SD normalized to T0 ( $n = 3$ ; \*  $p < 0.05$ ; \*\*  $p < 0.01$ , \*\*\*  $p < 0.001$ ); (D–E) Intracellular expression of selected miRNAs in BxPC-3 and (E) in PANC-1 cells after 72 h treatment with 20 nM gemcitabine (GEM) compared to the untreated cells. (F–G) Levels of selected sEV-miRNAs in the medium of BxPC-3 and PANC-1 cells after 72 h treatment with 20 nM gemcitabine (GEM) compared to untreated cells. Data are mean + SEM (\*\*  $p < 0.01$ ); Data are mean + SEM (\*  $p < 0.05$ , \*\*  $p < 0.01$ , \*\*\*  $p < 0.001$ ).

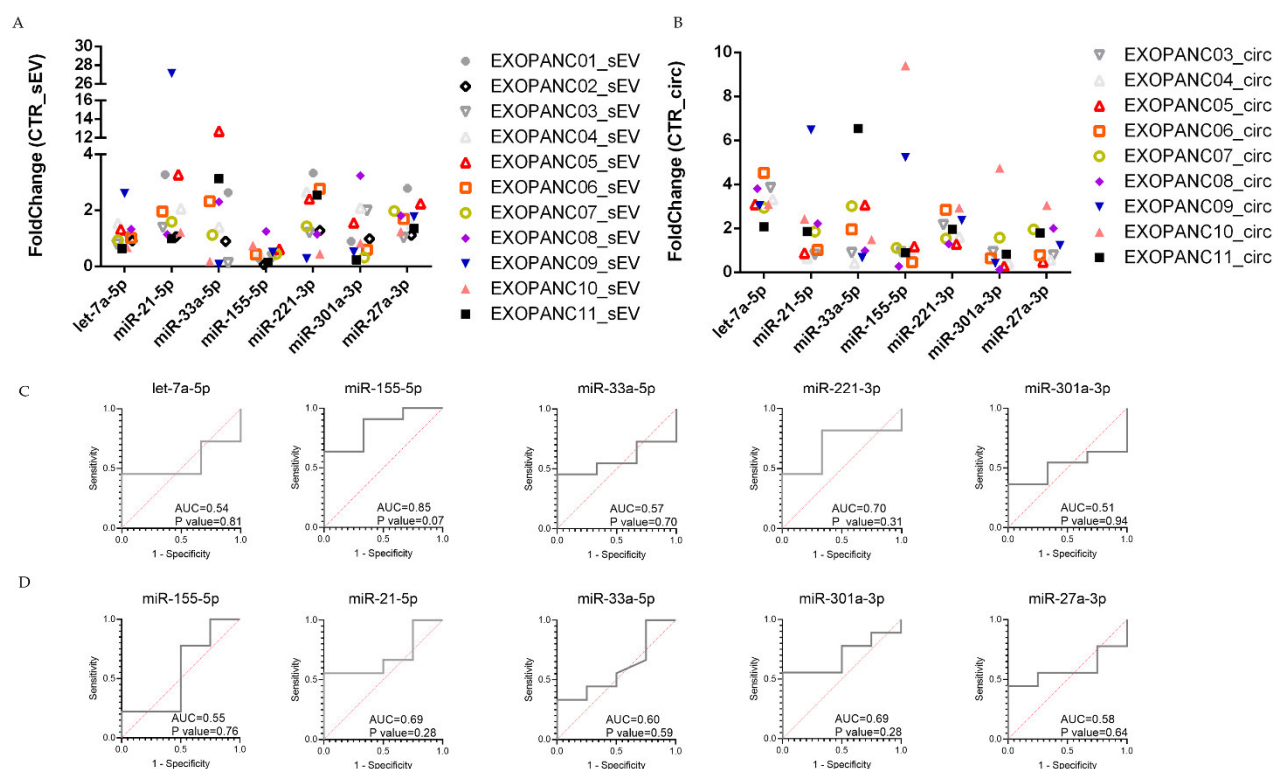

**Figure S2.** (A) Levels of selected vesicle-associated miRNAs in each pancreatic cancer patient (EXOPANC01-11). Fold-change between each EXOPANC patient compared to controls was reported; (B) Levels of selected circulating miRNAs in each pancreatic cancer patient (EXOPANC03-11). Fold-change between each EXOPANC patient compared to the controls was reported; (C-D) ROC curves with non-significant AUC. (C) Respective AUCs and  $p$  values of sEV-associated miRNAs detected in EXOPANC patients and controls quantified by RT-qPCR; (D) ROC curves of circulating miRNAs quantified by RT-qPCR extracted in EXOPANC patients and controls. The red dotted line represents an AUC threshold of 0.50. Sensitivity and 1-Specificity are represented for all of the obtained deltaCt values.

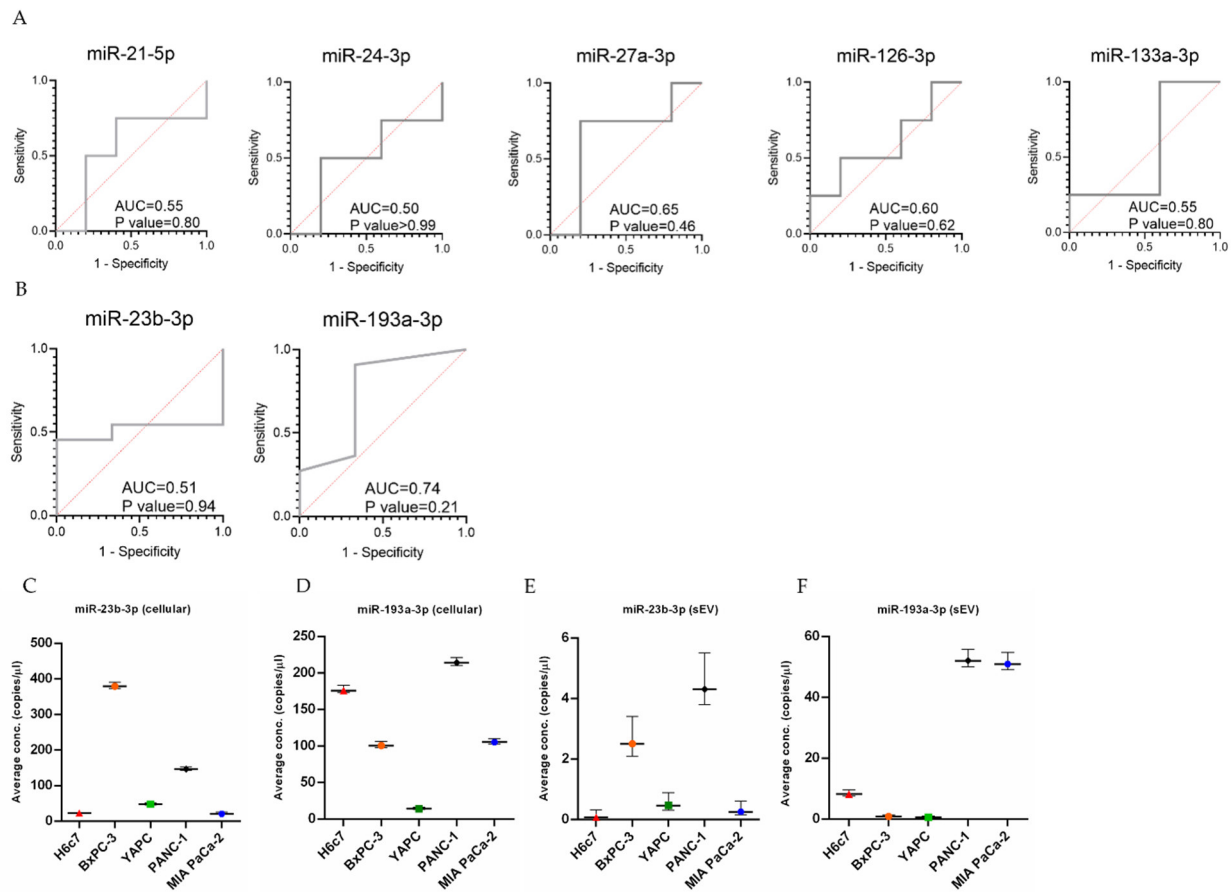

**Figure S3.** ROC curves with non-significant AUC. Respective AUCs and  $p$  values of miRNAs quantified by ddPCR. Sensitivity and 1-Specificity are represented for all the obtained copies/ $\mu$ L values. (A) ROC curves of circulating plasma miRNAs detected in EXOPANC patients and controls. (B) ROC curves of sEV-associated miRNAs extracted in EXOPANC patients and controls. The red dotted line represents an AUC threshold of 0.50. (C) Expression levels of miR-23b-3p and (D) miR-193a-3p in human normal and pancreatic cancer cell lines; (E) Levels of miR-23b-3p and (F) miR-193a-3p and in sEVs released in the media of pancreatic normal and cancer cells.

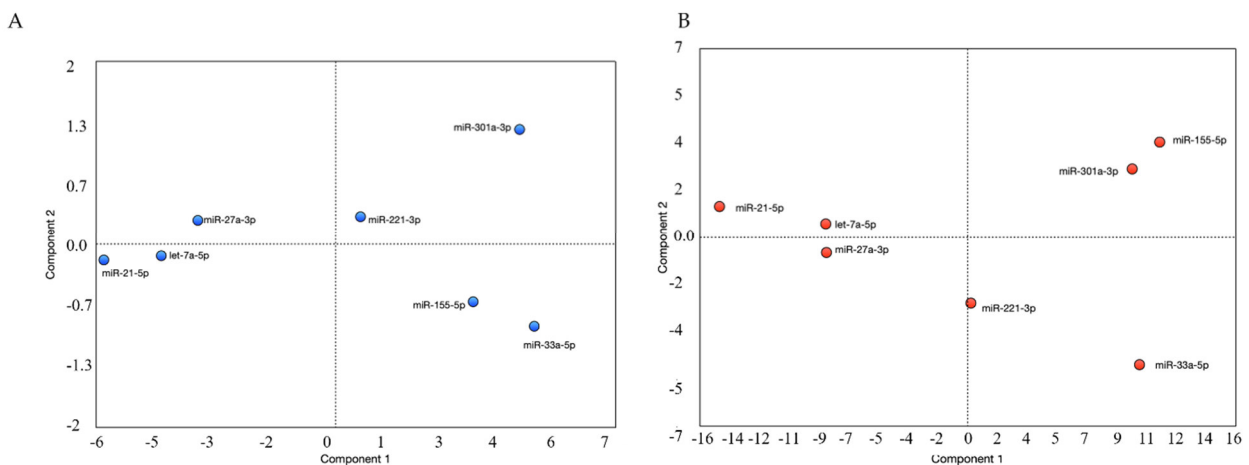

**Figure S4.** PCA analysis on vesicle-associated miRNAs in (A) healthy controls (blue dots) and (B) EXOPANC patients (red dots).

**Table S1.** Mienturnet Enrichment results as obtained from miRTarBase.

| Mienturnet Enrichment results miRTarBase |         |       |           |                        |                 |                |
|------------------------------------------|---------|-------|-----------|------------------------|-----------------|----------------|
| microRNA                                 | p-value | FDR   | Odd ratio | Number of interactions | Target Gene 1   | Target Gene 2  |
| hsa-miR-129-5p                           | 0.051   | 0.202 | 0.187     | 2                      | <i>ABCB1</i>    | <i>RUNDC3B</i> |
| hsa-miR-21-5p                            | 0.0491  | 0.202 | 0.183     | 2                      | <i>DMTF1</i>    | <i>ABCB1</i>   |
| hsa-miR-221-3p                           | 0.0191  | 0.202 | 0.11      | 2                      | <i>RUNDC3B</i>  | <i>CROT</i>    |
| hsa-miR-33a-5p                           | 0.00478 | 0.202 | 0.0535    | 2                      | <i>CROT</i>     | <i>RUNDC3B</i> |
| hsa-miR-1-3p                             | 0.101   | 0.202 | 0.275     | 2                      | <i>SRI</i>      | <i>ABCB1</i>   |
| hsa-miR-155-5p                           | 0.0978  | 0.202 | 0.27      | 2                      | <i>SLC25A40</i> | <i>DMTF1</i>   |
| hsa-miR-16-5p                            | 0.237   | 0.308 | 0.465     | 2                      | <i>DMTF1</i>    | <i>RUNDC3B</i> |

‘p-value’ indicates the p-values of the enrichment analysis, while ‘FDR’ indicates the adjusted p-values obtained by using the Benjamini-Hochberg (False Discovery Rate, FDR) procedure for multiple testing.

**Table S2.** Relationships between miRNAs and target genes using the miRTargetLink 2.0 platform <https://ccb-compute.cs.uni-saarland.de/mirtargetlink2/> (accessed on 14 March 2024).

| DMTF1           | TMEM243     | CROT            | ABCB1          | RUNDC3B        | SLC25A40       | DBF4            | ADAM22          | SRI               |
|-----------------|-------------|-----------------|----------------|----------------|----------------|-----------------|-----------------|-------------------|
| hsa-miR-15a-5p  | hsa-miR-484 | hsa-miR-17-5p   | hsa-miR-1-3p   | hsa-miR-10a-5p | hsa-miR-155-5p | hsa-miR-24-3p   | hsa-miR-33b-3p  | hsa-miR-1-3p      |
| hsa-miR-15b-5p  |             | hsa-miR-20a-5p  | hsa-miR-9-3p   | hsa-miR-10b-5p | hsa-miR-192-5p | hsa-miR-30a-5p  | hsa-miR-371a-3p | hsa-let-7a-3p     |
| hsa-miR-16-5p   |             | hsa-miR-20b-5p  | hsa-miR-21-5p  | hsa-miR-16-5p  | hsa-miR-215-5p | hsa-miR-30b-5p  | hsa-miR-371b-3p | hsa-let-7b-3p     |
| hsa-miR-21-5p   |             | hsa-miR-33a-5p  | hsa-miR-34b-3p | hsa-miR-29b-3p | hsa-miR-328-3p | hsa-miR-30c-5p  | hsa-miR-451b    | hsa-let-7f1-3p    |
| hsa-miR-103a-3p |             | hsa-miR-93-5p   | hsa-miR-129-5p | hsa-miR-33a-5p | hsa-miR-944    | hsa-miR-30d-5p  | hsa-miR-515-3p  | hsa-let7f-2-3p    |
| hsa-miR-103b    |             | hsa-miR-106b-5p | hsa-miR-186-5p | hsa-miR-93-3p  | hsa-miR-3161   | hsa-miR-30e-5p  | hsa-miR-519e-3p | hsa-miR-98-3p     |
| hsa-miR-147a    |             | hsa-miR-221-3p  | hsa-miR-223-3p | hsa-miR-99a-5p |                | hsa-miR-98-5p   | hsa-miR-539-5p  | hsa-miR-1185-1-3p |
| hsa-miR-155-5p  |             | hsa-miR-519d-3p | hsa-miR-451a   | hsa-miR-129-5p |                | hsa-miR-1304-3p | hsa-miR-570-3p  | hsa-miR-1185-2-3p |
| hsa-miR-195-5p  |             |                 | hsa-miR-491-3p | hsa-miR-150-5p |                | hsa-miR-4284    | hsa-miR-624-5p  | hsa-miR-3171      |
| hsa-miR-218-5p  |             |                 | hsa-miR-495-3p | hsa-miR-186-3p |                | hsa-miR-4325    | hsa-miR-770-5p  | hsa-miR-4789-5p   |
| hsa-miR-424-5p  |             |                 | hsa-miR-508-5p | hsa-miR-221-3p |                | hsa-miR-4772-3p | hsa-miR-3148    | hsa-miR-5580-3p   |
| hsa-miR-497-5p  |             |                 | hsa-miR-873-5p | hsa-miR-335-5p |                | hsa-miR-4793-3p | hsa-miR-3692-5p |                   |
| hsa-miR-503-5p  |             |                 |                | hsa-miR-483-3p |                | hsa-miR-6890-3p | hsa-miR-4704-5p |                   |

|                  |  |  |  |                 |  |              |                 |  |
|------------------|--|--|--|-----------------|--|--------------|-----------------|--|
| hsa-miR-644a     |  |  |  | hsa-miR-510-3p  |  | hsa-miR-8057 | hsa-miR-4712-5p |  |
| hsa-miR-646      |  |  |  | hsa-miR-532-3p  |  |              | hsa-miR-4716-5p |  |
| hsa-miR-3911     |  |  |  | hsa-miR-561-3p  |  |              | hsa-miR-5580-5p |  |
| hsa-miR-4474-3p  |  |  |  | hsa-miR-587     |  |              | hsa-miR-5581-3p |  |
| hsa-miR-4524a-5p |  |  |  | hsa-miR-629-3p  |  |              | hsa-miR-5701    |  |
| hsa-miR-4524b-5p |  |  |  | hsa-miR-1301-3p |  |              | hsa-miR-6080    |  |
| hsa-miR-4720-3p  |  |  |  | hsa-miR-2116-3p |  |              | hsa-miR-6124    |  |
| hsa-miR-6838-5p  |  |  |  | hsa-miR-3124-3p |  |              | hsa-miR-6782-3p |  |
| hsa-miR-6867-5p  |  |  |  | hsa-miR-4252    |  |              |                 |  |
|                  |  |  |  | hsa-miR-4287    |  |              |                 |  |
|                  |  |  |  | hsa-miR-4660    |  |              |                 |  |
|                  |  |  |  | hsa-miR-4685-3p |  |              |                 |  |
|                  |  |  |  | hsa-miR-4713-5p |  |              |                 |  |
|                  |  |  |  | hsa-miR-4766-5p |  |              |                 |  |
|                  |  |  |  | hsa-miR-5009-3p |  |              |                 |  |
|                  |  |  |  | hsa-miR-5047    |  |              |                 |  |
|                  |  |  |  | hsa-miR-5088-3p |  |              |                 |  |
|                  |  |  |  | hsa-miR-6867-3p |  |              |                 |  |

In orange the miRNAs identified using miRTargetLink 2.0.

**Table S3.** Characteristics of healthy donors.

| Characteristics of healthy donors (n=8) |              |
|-----------------------------------------|--------------|
| Gender (F/M)                            | 3/5          |
| Female                                  | 37.5%        |
| Male                                    | 62.5%        |
| Age. mean years (range)                 | 47.9 (40–58) |

Abbreviations: F/M, Female/Male.
